# Supplementary material for: Copper(ii) and cobalt(iii) Schiff base complexes with hydroxy anchors as sensitizers in dye-sensitized solar cells (DSSCs)
Source: Royal Society of Chemistry journal article supplement (doi:10.1039/d3ra00344b), 2023-01-01
Supplement: d3ra00344b1.pdf [file d3ra00344b1.pdf]

**Copper(II) and Cobalt(III) Schiff's Base Complexes with Hydroxy Anchors as Sensitizers in Dye-Sensitized Solar Cells (DSSCs)**

Chiteri Gautam,<sup>a</sup> Devyani Srivastava,<sup>a</sup> Gabriele Koicok-Köhn,<sup>b</sup> Suresh W. Gosavi,<sup>c</sup> Vinod K. Sharma,<sup>a</sup> Ratna Chauhan,<sup>d\*</sup> Dattatray J. Late,<sup>e</sup> Abhinav Kumar<sup>a\*</sup> and Mohd. Muddassir<sup>f</sup>

<sup>a</sup>*Department of Chemistry, Faculty of Science, University of Lucknow, Lucknow 226 007, India*

*Email: [abhinavmarshal@gmail.com](mailto:abhinavmarshal@gmail.com)*

<sup>b</sup>*Material and Chemical Characterisation Facility (MC<sup>2</sup>), University of Bath, Bath, BA27AY, UK*

<sup>c</sup>*Department of Physics, Faculty of Science, Savitribai Phule Pune University, Pune 411007, India*

<sup>d</sup>*Department of Environmental Science, Savitribai Phule Pune University, Pune 411007, India*

*Email: [ratnasingh.bhu@gmail.com](mailto:ratnasingh.bhu@gmail.com)*

<sup>e</sup>*Centre for Nanoscience and Nanotechnology Amity University Maharashtra, Mumbai- Pune Expressway, Bhatan, Post Somatne, Panvel, Mumbai, Maharashtra 410206, India*

<sup>f</sup>*Department of Chemistry, College of Sciences, King Saud University, Riyadh 11451, Saudi Arabia*

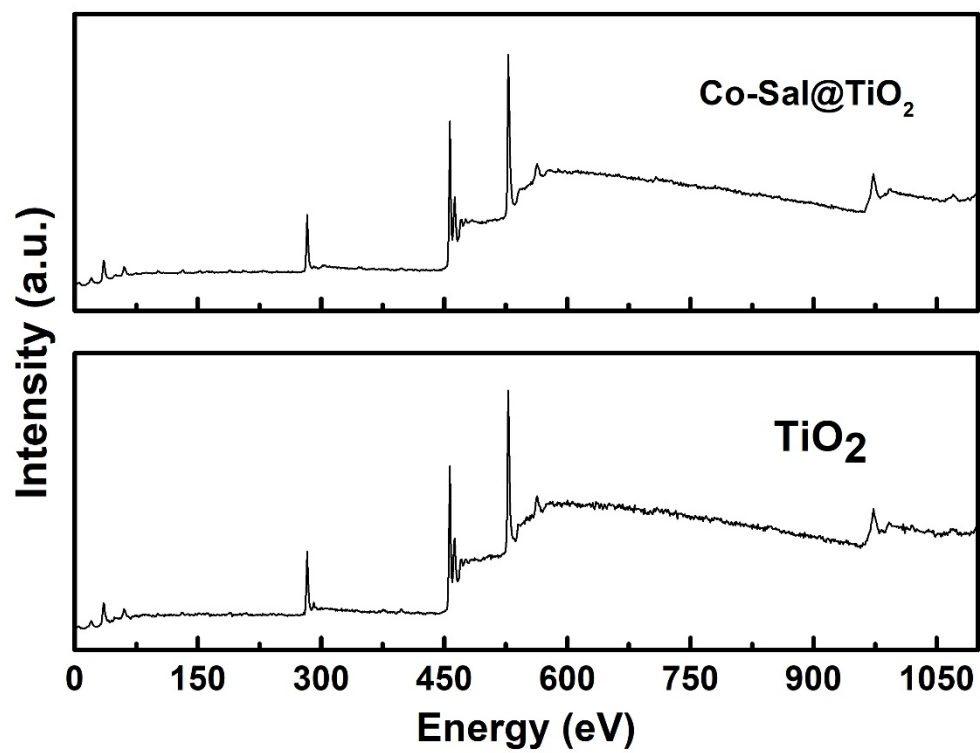

Fig. S1 Full XPS spectra for bare TiO<sub>2</sub> and Co-Sal@TiO<sub>2</sub>

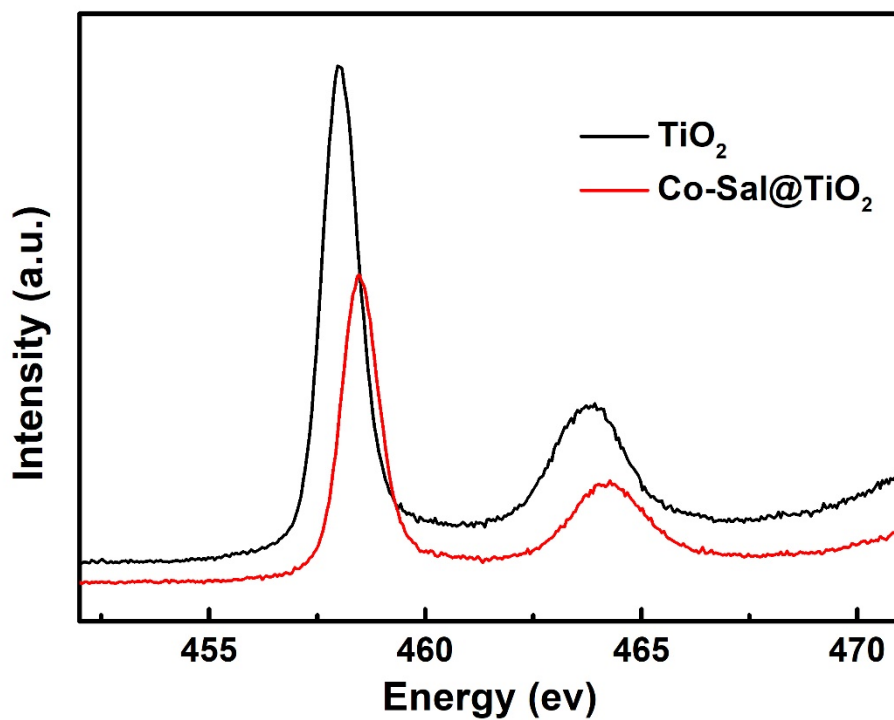

Fig. S2 XPS for Ti<sub>2p</sub> for TiO<sub>2</sub> and Co-Sal@TiO<sub>2</sub>

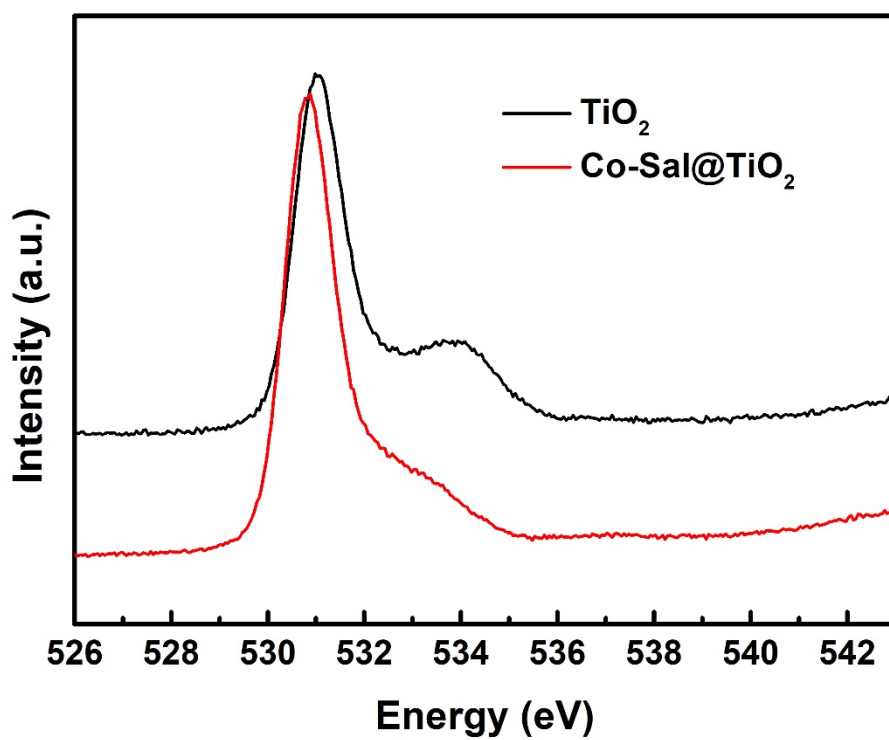

Fig. S3 XPS for O<sub>1s</sub> for TiO<sub>2</sub> and Co-Sal@TiO<sub>2</sub>.
